# Supplementary material
Source: MDPI journal article supplement (https://www.mdpi.com/2571-8789/7/4/96)
Supplement: s1 [file s1]

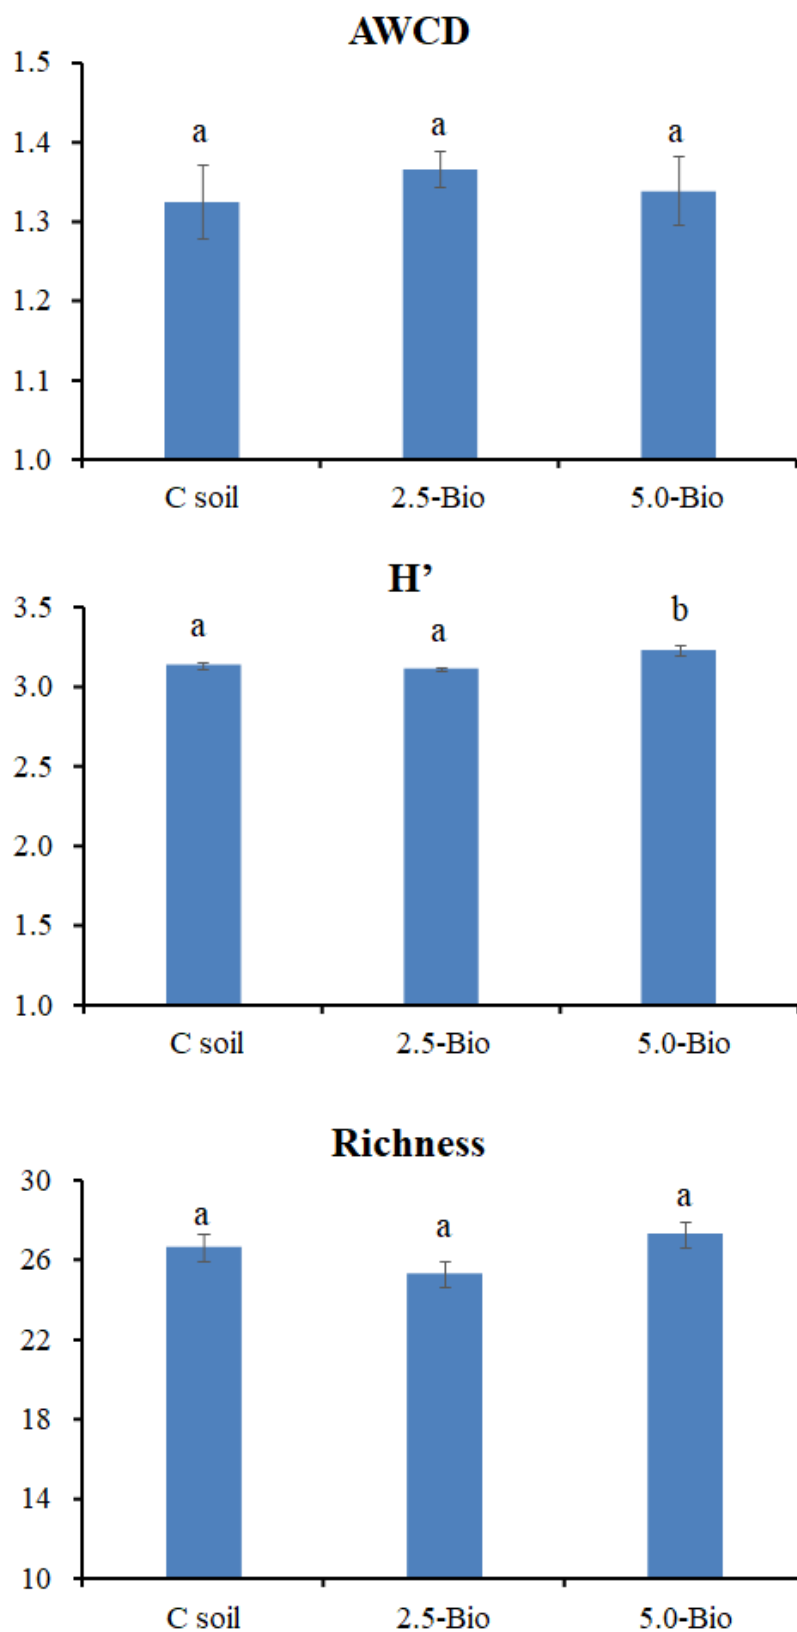

**Figure S1.** AWCD, H' and Richness values of contaminated (C soil) and amended soils (2.5-Bio or 5.0-Bio). Different letters indicate significant differences between treatments ( $P < 0.05$ ).

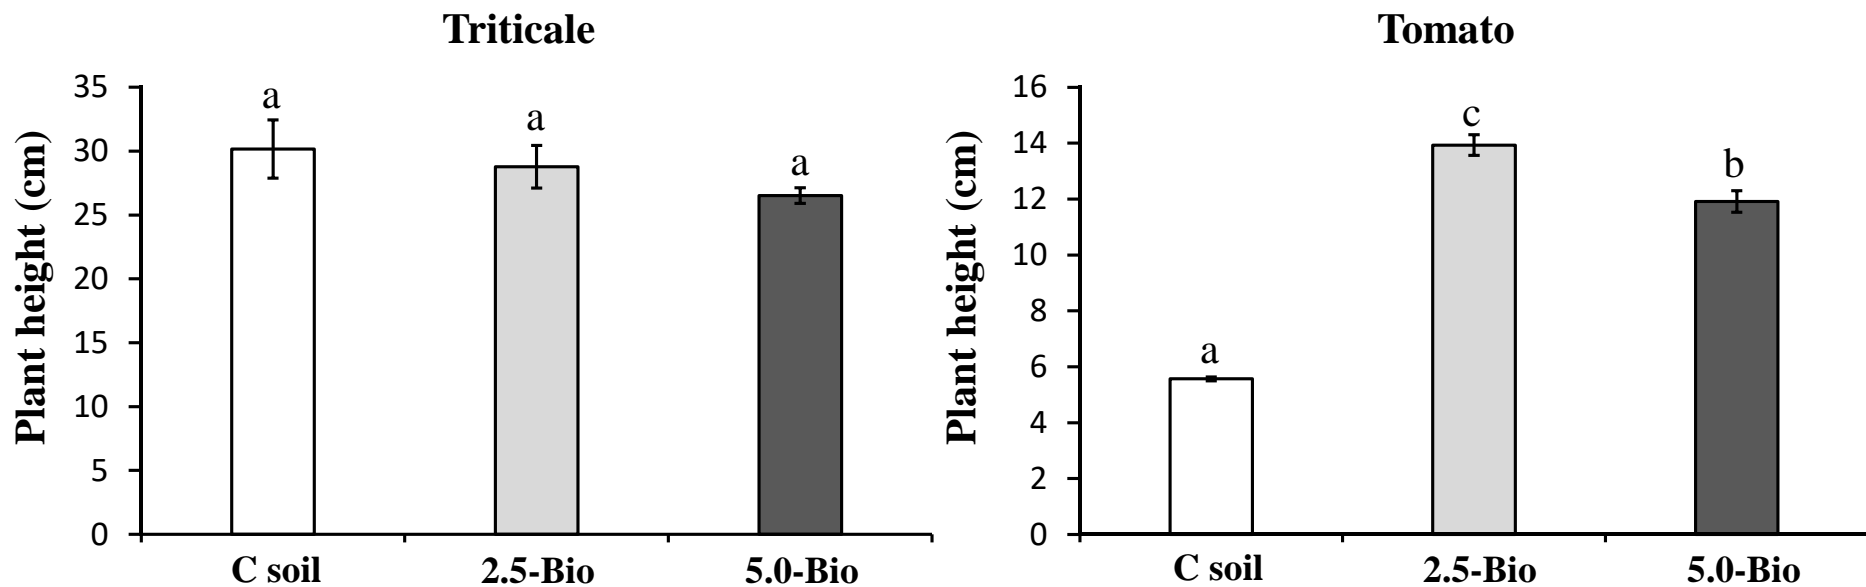

**Figure S2.** Height of triticale and tomato plants grown in contaminated (C soil) and amended soils (2.5-Bio or 5.0-Bio). For each plant species, different letters indicate significant differences between treatments ( $P < 0.05$ ).

**Table S1.** Selected chemical properties of the biochar used in this study. Values represent mean  $\pm$  SE (n = 3). u.d.l.: under detection limit (i.e.  $< 0.2 \mu\text{g}\cdot\text{L}^{-1}$ ).

| Chemical analyses                                                                  |                   |
|------------------------------------------------------------------------------------|-------------------|
| pH                                                                                 | $9.30 \pm 0.01$   |
| pH <sub>PZC</sub>                                                                  | $5.0 \pm 0.01$    |
| EC ( $\mu\text{S}\cdot\text{cm}^{-1}$ )                                            | $9.91 \pm 2.79$   |
| Ash (%)                                                                            | $2.44 \pm 0.10$   |
| Cation exchange capacity (CEC, $\text{cmol}_{(+)}\text{ kg}^{-1}$ )                | $18.81 \pm 0.30$  |
| Total organic carbon (%)                                                           | $61.32 \pm 0.06$  |
| Total nitrogen (%)                                                                 | $0.30 \pm 0.02$   |
| Total carbonate (%)                                                                | $1.52 \pm 0.02$   |
| Water dissolved organic carbon (DOC, $\text{mg}\cdot\text{kg}^{-1}$ )              | $0.020 \pm 0.003$ |
| Available P ( $\text{mg}\cdot\text{kg}^{-1}$ )                                     | $84.52 \pm 3.01$  |
| Water soluble and exchangeable K ( $\text{cmol}_{(+)}\text{ kg}^{-1}$ )            | $0.62 \pm 0.02$   |
| Exchangeable Ca ( $\text{cmol}_{(+)}\text{ kg}^{-1}$ )                             | $45.08 \pm 0.95$  |
| Exchangeable Mg ( $\text{cmol}_{(+)}\text{ kg}^{-1}$ )                             | $3.28 \pm 0.03$   |
| COOH groups ( $\text{meq}\cdot\text{g}^{-1}$ )                                     | $0.14 \pm 0.02$   |
| Phenolic groups ( $\text{meq}\cdot\text{g}^{-1}$ )                                 | $2.10 \pm 0.32$   |
| Pseudo-total Fe ( $\text{mg}\cdot\text{kg}^{-1}$ )                                 | $524.8 \pm 12.7$  |
| <i>Pseudo-total PTEs concentration (<math>\text{mg}\cdot\text{kg}^{-1}</math>)</i> |                   |
| Sb                                                                                 | u.d.l.            |
| As                                                                                 | u.d.l.            |
| Cd                                                                                 | u.d.l.            |
| Mn                                                                                 | $358.1 \pm 5.1$   |
| Pb                                                                                 | u.d.l.            |
| Cu                                                                                 | $207.1 \pm 2.9$   |
| Zn                                                                                 | u.d.l.            |

**Table S2.** Statistical analysis adopted for each of the investigated traits.

| <b>Trait</b>                                  | <b>Statistical analysis</b> |
|-----------------------------------------------|-----------------------------|
| Triticale height                              | ANOVA                       |
| Triticale root (dw)                           | ANOVA                       |
| Tomato shoot (dw)                             | ANOVA                       |
| Cd tomato shoot                               | ANOVA                       |
| Pb tomato root                                | ANOVA                       |
| Zn triticale shoot                            | ANOVA                       |
| Zn triticale root                             | ANOVA                       |
| EC                                            | ANOVA                       |
| Organic matter                                | ANOVA                       |
| Total P                                       | ANOVA                       |
| Total N                                       | Kruskal-Wallis              |
| P olsen                                       | ANOVA                       |
| DOC                                           | ANOVA                       |
| Pseudo-total Cd and Zn                        | ANOVA                       |
| Pb released NaOAc                             | ANOVA                       |
| Pb released Na <sub>2</sub> EDTA              | ANOVA                       |
| Cd released Ca(NO <sub>3</sub> ) <sub>2</sub> | ANOVA                       |
| Cd released Na <sub>2</sub> EDTA              | ANOVA                       |
| Zn released Ca(NO <sub>3</sub> ) <sub>2</sub> | ANOVA                       |
| Zn released NaOAc                             | ANOVA                       |
| Cd, Pb, and Zn residual                       | ANOVA                       |
| SMB-C                                         | ANOVA                       |
| Heterothrophic bacteria                       | ANOVA                       |
| Actinomycetes                                 | ANOVA                       |
| Tomato height                                 | Kruskal-Wallis              |
| Tomato root (dw)                              | Kruskal-Wallis              |
| Pb Tomato shoot                               | Kruskal-Wallis              |
| Zn Tomato shoot                               | Kruskal-Wallis              |
| Zn Tomato root                                | Kruskal-Wallis              |
| Cd Tomato root                                | Kruskal-Wallis              |
| Pb Triticale shoot                            | Kruskal-Wallis              |
| Cd Triticale shoot                            | Kruskal-Wallis              |
| Pb Triticale root                             | Kruskal-Wallis              |
| Cd Triticale root                             | Kruskal-Wallis              |
| pH soil                                       | Kruskal-Wallis              |
| CEC                                           | Kruskal-Wallis              |
| Pseudo-total Pb                               | Kruskal-Wallis              |
| Pb released Ca(NO <sub>3</sub> ) <sub>2</sub> | Kruskal-Wallis              |
| Cd released NaOAc                             | Kruskal-Wallis              |
| Zn released NaOAc                             | Kruskal-Wallis              |
| Zn released Na <sub>2</sub> EDTA              | Kruskal-Wallis              |
| Fungi                                         | Kruskal-Wallis              |
| Pseudomonas spp                               | Kruskal-Wallis              |

DHG  
URE

Kruskal-Wallis  
Kruskal-Wallis

---

**Table S3.** Quality control (QC) of the received sequence data. Sequences surviving each QC step of each sample are provided in the sequential columns.

| Sample_ID               | Input          | Filtered       | DenoisedF      | DenoisedR      | Merged        | Non<br>chimeric | No Eukaryotic, or<br>uncharacterised | No<br>Chloroplast | No<br>Mitochondria |
|-------------------------|----------------|----------------|----------------|----------------|---------------|-----------------|--------------------------------------|-------------------|--------------------|
| S1 0 %                  | 19,220         | 9,326          | 7,999          | 7,608          | 4,624         | 3,829           | 3,793                                | 3,793             | 3,793              |
| S2 0 %                  | 26,957         | 12,663         | 11,165         | 10,684         | 6,447         | 4,825           | 4,755                                | 4,755             | 4,747              |
| S3 0 %                  | 19,239         | 9,101          | 7,799          | 7,354          | 4,287         | 3,630           | 3,630                                | 3,630             | 3,630              |
| S4 2.5 %                | 20,502         | 9,702          | 8,423          | 7,860          | 4,478         | 3,600           | 3,593                                | 3,593             | 3,593              |
| S5 2.5 %                | 44,491         | 20,764         | 18,696         | 17,841         | 11,285        | 8,273           | 8,221                                | 8,221             | 8,221              |
| S6 2.5 %                | 23,098         | 11,175         | 9,579          | 9,188          | 5,399         | 4,098           | 4,088                                | 4,088             | 4,088              |
| S7 5 %                  | 29,373         | 13,305         | 11,773         | 11,173         | 6,664         | 5,499           | 5,487                                | 5,487             | 5,487              |
| S8 5 %                  | 38,806         | 16,553         | 14,781         | 13,911         | 8,582         | 6,762           | 6,683                                | 6,675             | 6,675              |
| S9 5 %                  | 39,323         | 19,026         | 17,040         | 16,121         | 10,139        | 7,429           | 7,384                                | 7,384             | 7,384              |
| <b>Total</b>            | <b>261,009</b> | <b>121,615</b> | <b>107,255</b> | <b>101,740</b> | <b>61,905</b> | <b>47,945</b>   | <b>47,634</b>                        | <b>47,626</b>     | <b>47,618</b>      |
| <b>% of<br/>initial</b> |                | <b>46.6%</b>   | <b>41.1%</b>   | <b>39.0%</b>   | <b>23.7%</b>  | <b>18.4%</b>    | <b>18.2%</b>                         | <b>18.2%</b>      | <b>18.2%</b>       |
